# Supplementary material
Source: PubMed Central journal article supplement (PMC2994990)

**Table 5: Connectivity analysis for dACC -- Psychophysiological interaction**

| Region <sup>a</sup>           | (x, y, z) <sup>b</sup> | <u>Ctrl</u>          |                | <u>Schiz</u>  |            |      |
|-------------------------------|------------------------|----------------------|----------------|---------------|------------|------|
|                               |                        | Cluster <sup>c</sup> | Z <sup>d</sup> | (x, y, z)     | Cluster    | Z    |
| <i>Positive coupling</i>      |                        |                      |                |               |            |      |
| L superior medial frontal g   | 0, 54, 24              | 39                   | 4.67           |               |            |      |
|                               | -3, 12, 57             | <u>193</u>           | 4.24           |               |            |      |
|                               | -6, 21, 48             |                      | 3.40           |               |            |      |
| L middle frontal g            | -48, 18, 36            | 33                   | 3.73           |               |            |      |
| R middle frontal g            | 54, 9, 45              | <u>99</u>            | 3.41           |               |            |      |
| L fusiform g                  | -42, -57, -24          | 42                   | 3.57           |               |            |      |
| R fusiform g                  | 45, -63, -21           | 75                   | 4.07           |               |            |      |
|                               |                        |                      |                | 24, -87, 21   | 62         | 4.01 |
| R superior/middle occipital g |                        |                      |                | -27, -87, 18  | <u>110</u> | 3.91 |
| L superior/middle occipital g |                        |                      |                | -6, -84, -6   | 59         | 3.52 |
| L calcarine cortex/lingual g  |                        |                      |                | -42, -66, -27 | <u>108</u> | 3.73 |
| L cerebellum                  |                        |                      |                |               |            |      |
| <i>Negative coupling</i>      |                        |                      |                |               |            |      |
| L superior temporal g         | -42, -24, 6            | <u>200</u>           | 3.61           |               |            |      |

<sup>a</sup>Regions from (Tzourio-Mazoyer et al., 2002), g = 'gyrus', L = 'left', R = 'right'

<sup>b</sup>Stereotactic coordinates from MNI152 reference, left/right, anterior/posterior and superior/inferior, respectively

<sup>c</sup>Cluster size in voxels; underline indicates  $p < 0.05$ , dashed underline  $p < 0.10$ , corrected for whole brain,

<sup>d</sup>Z-scores of maxima without cluster size are within cluster listed above; underlined values are  $p < 0.05$ , FDR corrected for whole brain (Genovese et al., 2002)

Figure(s)

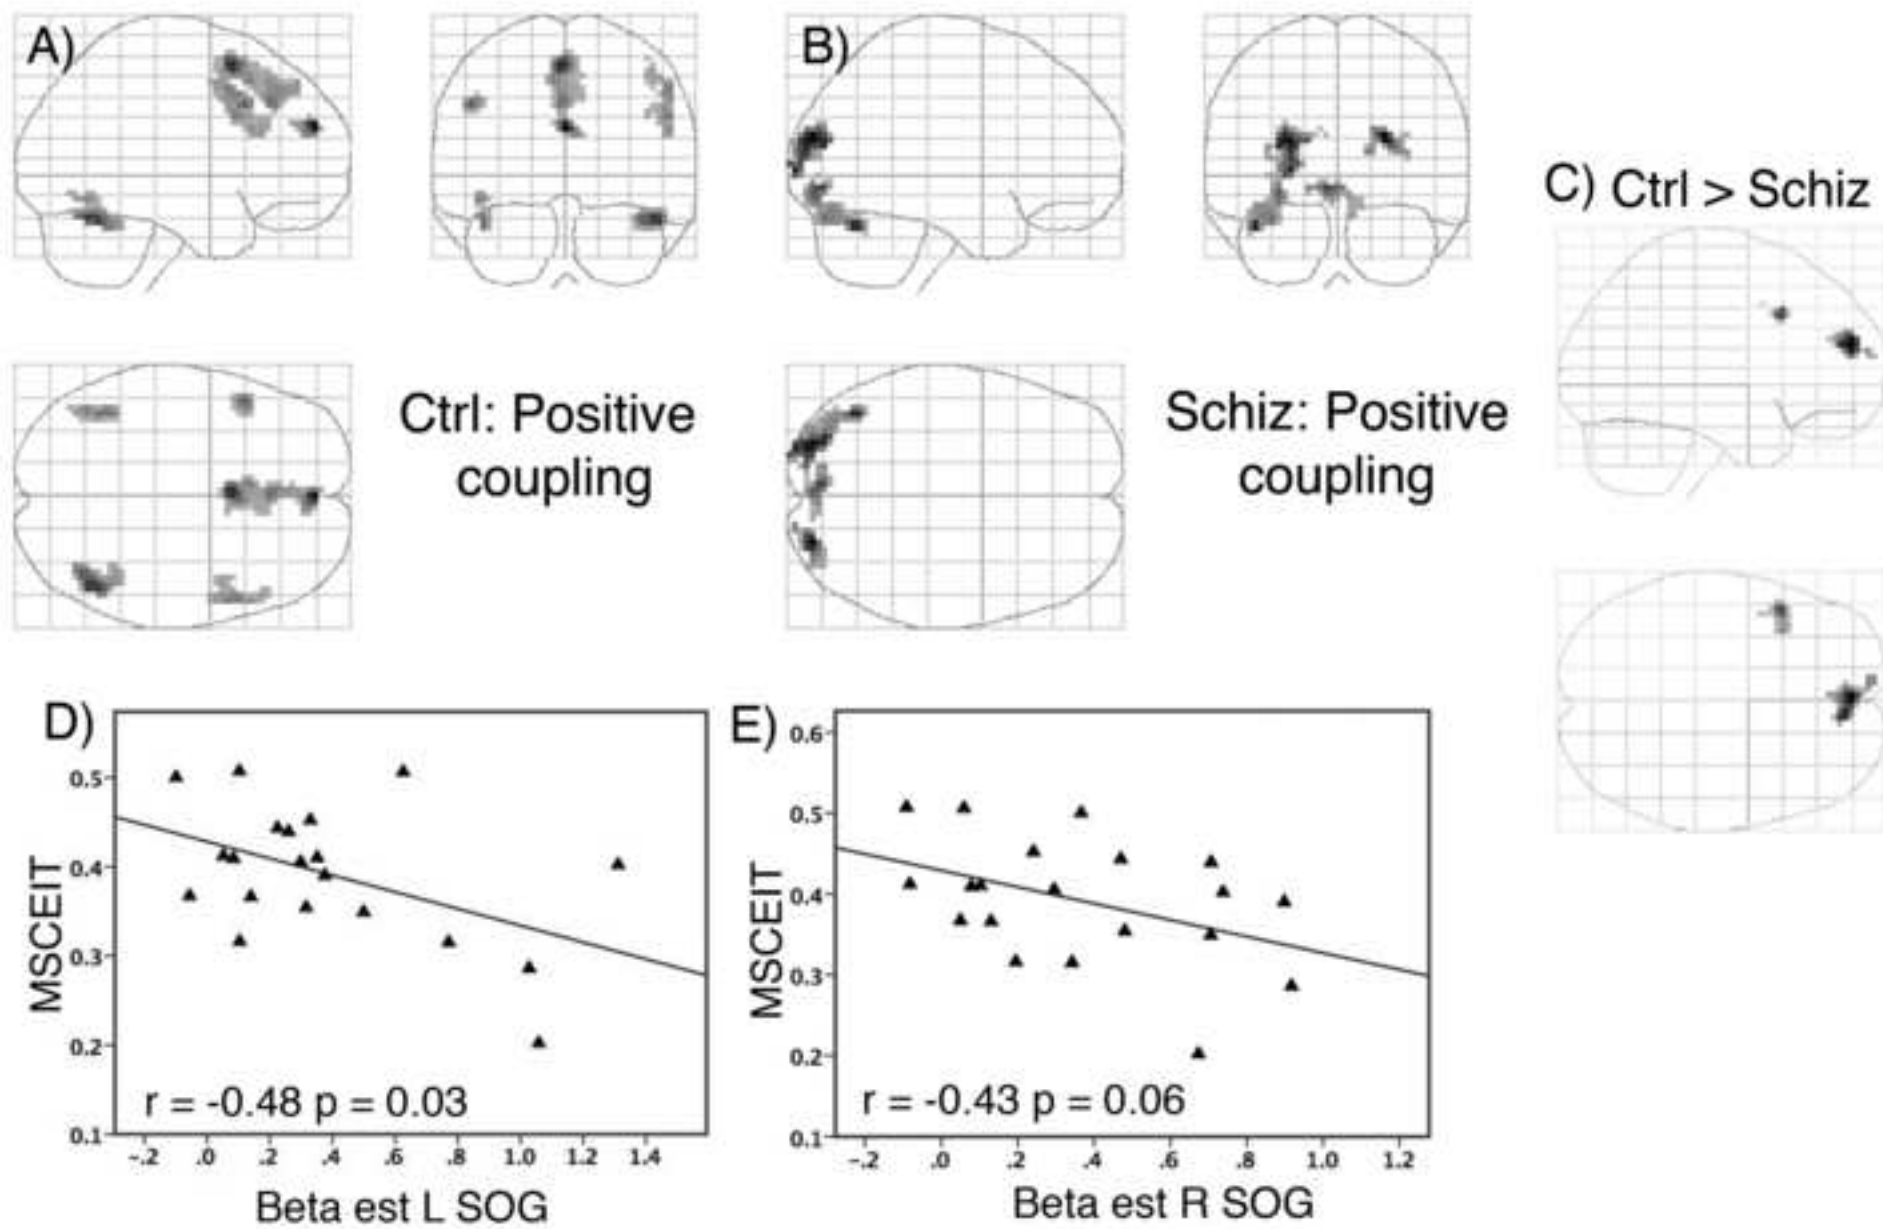

Supplement: NIHMS229072-supplement-01.pdf [file NIHMS229072-supplement-01.pdf]
